# Supplementary material for: iTRAQ-Based Quantitative Proteomics Analysis on Rice Anther Responding to High Temperature
Source: MDPI journal article supplement (doi:10.3390/ijms18091811), 2017-08-23
Supplement: s1 [file s1]

**Table S1** Temperature setting of the growth chamber for different heat treatment. The second line of the table head indicate different time of a day. The last four lines indicate the heat treatments and corresponding temperatures set at each time point (°C).

| Heat      | Time point |       |       |      |      |      |      |      |      |      |      |      |      |       |       |       |       |       |       |       |       |       |       |       |
|-----------|------------|-------|-------|------|------|------|------|------|------|------|------|------|------|-------|-------|-------|-------|-------|-------|-------|-------|-------|-------|-------|
| treatment | 21:00      | 22:00 | 23:00 | 0:00 | 1:00 | 2:00 | 3:00 | 4:00 | 5:00 | 6:00 | 7:00 | 8:00 | 9:00 | 10:00 | 11:00 | 12:00 | 13:00 | 14:00 | 15:00 | 16:00 | 17:00 | 18:00 | 19:00 | 20:00 |
| CK        | 28         | 28    | 27    | 26   | 26   | 25   | 25   | 25   | 25   | 25   | 26   | 26   | 27   | 28    | 29    | 30    | 30    | 31    | 31    | 30    | 30    | 29    | 29    | 28    |
| 33 °C     | 30         | 30    | 29    | 29   | 28   | 28   | 27   | 27   | 27   | 27   | 28   | 28   | 30   | 30    | 32    | 32    | 33    | 33    | 32    | 32    | 31    | 31    | 30    | 30    |
| 35 °C     | 32         | 31    | 31    | 30   | 30   | 29   | 29   | 29   | 29   | 29   | 29   | 30   | 31   | 32    | 33    | 34    | 35    | 35    | 35    | 35    | 35    | 34    | 34    | 32    |
| 37 °C     | 34         | 33    | 33    | 32   | 32   | 32   | 31   | 31   | 31   | 31   | 31   | 32   | 32   | 34    | 34    | 36    | 36    | 37    | 37    | 37    | 37    | 36    | 36    | 34    |
